# Supplementary material
Source: PubMed Central journal article supplement (PMC3431177)
Supplement: neo1408_0702SD1.pdf [file neo1408_0702SD1.pdf]

**Table W1.** Primer Sequences and siRNA/shRNA Clone Details.

| Gene Symbol    | Clone ID          |
|----------------|-------------------|
| <i>EGFR</i>    | LU-003114-00-0002 |
| <i>ERBB2</i>   | SHCLNV-NM_004448  |
| <i>RPS6KB1</i> | SHCLNV-NM_003161  |

  

| Primer     | Sequence                    |
|------------|-----------------------------|
| EGFR-f1    | GGGCCAGGTCTTGAAGGCTGT       |
| EGFR-r1    | ATCCCAGGGCCACCACCAG         |
| EGFR-f2    | ACACCCTGGTCTGGAAGTACGCA     |
| EGFR-r2    | AGTGGGAGACTAAAGTCAGACAGTGAA |
| EGFR-f3    | CCGAGGCAGGGAATGCGTGG        |
| EGFR-r3    | TGGCCTGAGGCAGGCACTCT        |
| ERBB2-f1   | TGCGCAGGCAGTGATGAGAGT       |
| ERBB2-r1   | TCTCGGGACTGGCAGGGAGC        |
| ERBB2-f2   | TCCTCCTCGCCCTCTTGCCC        |
| ERBB2-r2   | TCTCGGGACTGGCAGGGAGC        |
| RPS6KB1-f1 | TGCTGACTGGAGCACCCCCA        |
| RPS6KB1-r1 | GCTTCTTGTGTGAGGTAGGGAGGC    |
| GAPDH-f1   | GGCTGAGAACGGGAAGCTTGTCA     |
| GAPDH-r1   | TCTCCATGGTGGTGAAGACGCCA     |
| MAST2_f1   | GAAGTGAGTGAGGATGGCTGCCTT    |
| MAST2_r1   | GAGCCGCTCCATGCTGCTGTAC      |
| MAST2_f2   | ATTGAGGGCCATGGGGCATCT       |
| MAST2_r2   | CCCCATAGGCGCCATTGCTGATG     |

**Table W2.** List of Gene Fusions Identified in 14 Breast Cancer Cell Lines, along with Their Copy Number Status.

| Sample Name | 5' Gene         | 3' Gene        | Type  | Sequencing Platform | No. Reads | Validation | Chromosomal Location     | 3' Gene                   | aCGH Data (5' and 3') |                   |           | Amplicon Status |                   |
|-------------|-----------------|----------------|-------|---------------------|-----------|------------|--------------------------|---------------------------|-----------------------|-------------------|-----------|-----------------|-------------------|
|             |                 |                |       |                     |           |            |                          |                           | No. Probe             | Average Log Ratio | No. Probe |                 | Average Log Ratio |
|             |                 |                |       |                     |           |            |                          |                           | Fusion QPCR           |                   |           |                 |                   |
| BT-474      | <i>RPS6KB1</i>  | <i>SNF8</i>    | Intra | GA II               | 92        | Y          | chr17:44362457-44377153  | chr17:44362457-44377153   | 5                     | 2.890             | 2         | 3.557           | Yes               |
| BT-474      | <i>STX16</i>    | <i>RAE1</i>    | Intra | GA II               | 79        | Y          | chr20:55360024-55386926  | chr20:55360024-55386926   | 4                     | 2.910             | 4         | 2.910           | Yes               |
| BT-474      | <i>ZMYND8</i>   | <i>CEP250</i>  | Intra | GA II               | 77        | Y          | chr20:45271787-45418881  | chr20:33060636-33563217   | 15                    | 3.650             | 5         | 1.876           | Yes               |
| BT-474      | <i>TRPC4AP</i>  | <i>MXRPL45</i> | Intra | GA II               | 30        | Y          | chr20:33053867-33144279  | chr17:33053867-33144279   | 11                    | 3.290             | 4         | 3.452           | Yes               |
| BT-474      | <i>MEDI1</i>    | <i>STXBP4</i>  | Intra | GA II               | 28        | Y          | chr17:50401124-50596448  | chr17:50401124-50596448   | 4                     | 4.029             | 21        | 2.507           | Yes               |
| BT-474      | <i>TOBI</i>     | <i>ATX1BP1</i> | Intra | GA II               | 16        | Y          | chr17:32949013-33043559  | chr17:32949013-33043559   | 1                     | 2.787             | 10        | 2.556           | Yes               |
| BT-474      | <i>ACACA</i>    | <i>STAC2</i>   | Intra | GA II               | 15        | Y          | chr17:346200314-34635566 | chr17:346200314-34635566  | 35                    | 2.556             | 3         | 4.029           | Yes               |
| BT-474      | <i>MEDI13</i>   | <i>BCAS3</i>   | Intra | GA II               | 13        | Y          | chr17:57374747-57497425  | chr17:56109953-56824981   | 13                    | 1.012             | 73        | 1.934           | Yes               |
| BT-474      | <i>VAPB</i>     | <i>KZF3</i>    | Intra | GA II               | 13        | Y          | chr20:56397580-56459562  | chr19:1754724-35273967    | 7                     | 3.404             | 10        | 3.701           | Yes               |
| BT-474      | <i>RAB22A</i>   | <i>MYO9B</i>   | Intra | GA II               | 9         | Y          | chr20:56318176-56379605  | chr19:17047590-17185104   | 6                     | 3.404             | 13        | 2.122           | Yes               |
| BT-474      | <i>GLI1</i>     | <i>CMTM7</i>   | Intra | GA II               | 7         | Y          | chr3:33013103-33113698   | chr3:32408166-32471337    | 11                    | -0.425            | 6         | 0.428           | Yes               |
| BT-474      | <i>NCOA2</i>    | <i>ZNF704</i>  | Intra | GA II               | 7         | Y          | chr8:11186820-71478574   | chr8:81703240-81949571    | 35                    | 0.916             | 26        | 0.640           | Yes               |
| BT-474      | <i>BCAS3</i>    | <i>MEDI13</i>  | Intra | GA II               | 6         | Y          | chr17:56109953-56824981  | chr17:57374747-57497425   | 73                    | 1.934             | 13        | 1.012           | Yes               |
| BT-474      | <i>PIP4K2B</i>  | <i>RAD51C</i>  | Intra | GA II               | 6         | Y          | chr17:34175469-34209684  | chr17:54124961-54166691   | 6                     | 4.813             | 5         | 1.700           | Yes               |
| BT-474      | <i>PPP1R12A</i> | <i>MGAT4C</i>  | Intra | GA II               | 6         | Y          | chr12:78691473-78853366  | chr12:84897167-85756812   | 19                    | 1.218             | 90        | -0.397          | Yes               |
| BT-474      | <i>STAR3</i>    | <i>DOCK5</i>   | Intra | GA II               | 6         | Y          | chr17:35046858-35073980  | chr17:31925711-31965418   | 5                     | 4.821             | 27        | 0.076           | Yes               |
| BT-474      | <i>TRIM37</i>   | <i>MYO19</i>   | Intra | GA II               | 6         | Y          | chr17:54414781-54539048  | chr17:31925711-31965418   | 14                    | 2.244             | 6         | 2.344           | Yes               |
| BT-483      | <i>SMARCB1</i>  | <i>MARK3</i>   | Intra | GA II               | 7         | Y          | chr22:22459149-22506705  | chr14:102921453-103039919 | 8                     | 1.170             | 17        | 0.381           | Yes               |
| BT-549      | <i>CLTC</i>     | <i>TMEM49</i>  | Intra | GA II               | 18        | Y          | chr17:55051831-55129099  | chr17:55139644-55272734   | 9                     | -0.283            | 18        | -1.185          | Yes               |
| HCC1143     | <i>C18orf45</i> | <i>HM13</i>    | Intra | GA II               | 25        | Y          | chr18:19129977-19271923  | chr20:29565901-29591257   | 18                    | 1.280             | 2         | 1.403           | Yes               |
| HCC1143     | <i>C2ORF48</i>  | <i>RRM2</i>    | Intra | GA II               | 23        | Y          | chr2:10198959-10269307   | chr2:10180145-10188997    | 8                     | 0.134             | 2         | 0.134           | Yes               |
| HCC1187     | <i>PUM1</i>     | <i>TREX1</i>   | Intra | GA II               | 38        | Y          | chr1:31176939-31311151   | chr6:42300646-42527761    | 14                    | 1.648             | 27        | 0.336           | Yes               |
| HCC1187     | <i>SEC22B</i>   | <i>NOTCH2</i>  | Intra | GA II               | 30        | Y          | chr1:14380763-143828279  | chr1:120255698-120413799  | 2                     | 1.557             | 11        | 0.253           | Yes               |
| HCC1187     | <i>CTAGE5</i>   | <i>SIP1</i>    | Intra | GA II               | 15        | Y          | chr14:38806079-38890148  | chr14:38806079-388675928  | 29                    | 0.940             | 4         | 0.235           | Yes               |
| HCC1187     | <i>MCPHI</i>    | <i>AGPAT5</i>  | Intra | GA II               | 11        | Y          | chr8:6251520-6488548     | chr8:6553285-6606429      | 9                     | 0.495             | 5         | 0.738           | Yes               |
| HCC1187     | <i>KLK5</i>     | <i>CDH23</i>   | Intra | GA II               | 5         | Y          | chr19:56138370-56148156  | chr10:73225333-73245710   | 3                     | 0.888             | 1         | 0.953           | Yes               |
| HCC1187     | <i>BCO4L478</i> | <i>EXOSC10</i> | Intra | GA II               | 3         | Y          | chr19:42434668-42446354  | chr1:11049262-11082525    | 1                     | 0.816             | 4         | 0.156           | Yes               |
| HCC1395     | <i>E1F3K</i>    | <i>CYP39A1</i> | Intra | GA II               | 13        | Y          | chr19:43801561-43819435  | chr6:46625403-46728482    | 2                     | 0.852             | 11        | 0.611           | Yes               |
| HCC1395     | <i>HNRNPUL2</i> | <i>AHNAK</i>   | Intra | GA II               | 13        | Y          | chr11:62238795-62251397  | chr11:62039949-62070908   | 2                     | 0.629             | 5         | 1.172           | Yes               |
| HCC1395     | <i>RAB7A</i>    | <i>LRCH3</i>   | Intra | GA II               | 6         | Y          | chr3:129927668-130016331 | chr3:199002541-199082853  | 10                    | 0.755             | 11        | -0.615          | Yes               |
| HCC1395     | <i>EROL1</i>    | <i>FERMT2</i>  | Intra | GA II               | 5         | Y          | chr14:52178354-52232169  | chr14:52395955-52487565   | 7                     | 0.934             | 14        | 0.934           | Yes               |
| HCC1395     | <i>FOSL2</i>    | <i>BRE</i>     | Intra | GA II               | 5         | Y          | chr2:284669282-28491020  | chr2:27966985-28415271    | 3                     | 0.480             | 51        | 0.849           | Yes               |
| HCC1395     | <i>BCAR3</i>    | <i>ABCA4</i>   | Intra | GA II               | 4         | Y          | chr1:93799936-93919973   | chr1:94230981-94359293    | 13                    | 0.849             | 13        | 0.849           | Yes               |
| HCC1954     | <i>C6orf106</i> | <i>SPDEF</i>   | Intra | GA II               | 24        | Y          | chr6:34663048-34772603   | chr6:34613557-34632069    | 13                    | 0.036             | 3         | 0.374           | Yes               |
| HCC1954     | <i>INTS1</i>    | <i>PRKAR1B</i> | Intra | GA II               | 22        | Y          | chr7:1476438-1510544     | chr7:555359-718687        | 4                     | 1.034             | 4         | 0.374           | Yes               |
| HCC1954     | <i>GALNT7</i>   | <i>ORC4L</i>   | Intra | GA II               | 9         | Y          | chr4:174326478-174481693 | chr2:148408201-148494933  | 15                    | 0.409             | 7         | 0.504           | Yes               |
| HCC2218     | <i>SEC16A</i>   | <i>NOTCH1</i>  | Intra | GA II               | 14        | Y          | chr9:138454368-138497328 | chr9:138508716-138560059  | 6                     | 0.000             | 7         | -0.967          | Yes               |
| HCC2218     | <i>POLDIP2</i>  | <i>BRP1</i>    | Intra | GA II               | 8         | Y          | chr17:23697785-23708730  | chr17:57111328-57295702   | 3                     | 1.113             | 19        | 3.925           | Yes               |
| HCC2218     | <i>INTS2</i>    | <i>ZNF652</i>  | Intra | GA II               | 7         | Y          | chr17:57297509-57360159  | chr17:44721566-44794834   | 9                     | 3.925             | 6         | 2.649           | Yes               |
| HCC2218     | <i>INTS2</i>    | <i>TMEM49</i>  | Intra | GA II               | 5         | Y          | chr17:57297509-57360159  | chr17:55139644-55272734   | 9                     | 3.925             | 18        | 3.202           | Yes               |
| HCC2218     | <i>LRRCS9</i>   | <i>NEUROD2</i> | Intra | GA II               | 5         | Y          | chr17:45813592-45829913  | chr17:35015546-35017701   | 3                     | 2.649             | 1         | 3.451           | Yes               |
| HCC2218     | <i>PERLD1</i>   | <i>PPM1D</i>   | Intra | GA II               | 4         | Y          | chr17:35082579-35097833  | chr17:56032335-56096818   | 2                     | 3.451             | 7         | 3.340           | Yes               |
| MC7         | <i>BCAS4</i>    | <i>BCA3</i>    | Intra | GA II               | 2788      | Y          | chr20:48844873-48927121  | chr17:56109953-56824981   | 7                     | 2.107             | 73        | 2.653           | Yes               |
| MC7         | <i>ARFGAP2</i>  | <i>SLEF2</i>   | Intra | GA II               | 305       | Y          | chr20:46971681-47086637  | chr20:45179556-45848215   | 11                    | 0.823             | 13        | 3.398           | Yes               |
| MC7         | <i>RPS6KB1</i>  | <i>TMEM49</i>  | Intra | GA II               | 78        | Y          | chr17:5532524-55382568   | chr20:45179556-45848215   | 5                     | 3.412             | 18        | 2.197           | Yes               |
| MC7         | <i>STK11</i>    | <i>MIDN</i>    | Intra | GA II               | 25        | Y          | chr19:1156797-1179434    | chr19:1199551-1210142     | 4                     | -1.367            | 2         | -0.279          | Yes               |
| MC7         | <i>PAPOLA</i>   | <i>AK7</i>     | Intra | GA II               | 16        | Y          | chr14:96038472-96103201  | chr14:9528200-96024865    | 7                     | 0.343             | 13        | 0.343           | Yes               |
| MC7         | <i>AHCYL1</i>   | <i>RAD51C</i>  | Intra | GA II               | 11        | Y          | chr1:110328830-110367887 | chr17:54124961-54166691   | 4                     | -0.063            | 5         | 2.788           | Yes               |
| MC7         | <i>E1F3H</i>    | <i>FAM65C</i>  | Intra | GA II               | 12        | Y          | chr8:117726235-117837243 | chr20:48636052-48686833   | 12                    | 0.456             | 5         | 1.554           | Yes               |
| MC7         | <i>BCO17255</i> | <i>TMEM49</i>  | Intra | GA II               | 10        | Y          | chr17:54538741-54550409  | chr17:55139644-55272734   | 1                     | 3.515             | 18        | 2.197           | Yes               |
| MC7         | <i>ADAMTS19</i> | <i>SLC27A6</i> | Intra | GA II               | 9         | Y          | chr5:128824001-129102275 | chr5:128329108-128397234  | 30                    | 0.051             | 8         | 0.051           | Yes               |
| MC7         | <i>ARHGAP19</i> | <i>DRG1</i>    | Intra | GA II               | 8         | Y          | chr10:98971919-99042403  | chr22:30125538-30160172   | 8                     | 0.387             | 5         | -0.420          | Yes               |

**Table W2.** (continued)

| Sample Name | 5' Gene                | 3' Gene         | Type  | Sequencing Platform | No. Reads | Validation | Chromosomal Location     |                          | aCGH Data (5' and 3') |                   |           |                   | Amplicon Status |           |                   |
|-------------|------------------------|-----------------|-------|---------------------|-----------|------------|--------------------------|--------------------------|-----------------------|-------------------|-----------|-------------------|-----------------|-----------|-------------------|
|             |                        |                 |       |                     |           |            | 5' Gene                  | 3' Gene                  | No. Probe             | Average Log Ratio | No. Probe | Average Log Ratio |                 | No. Probe | Average Log Ratio |
|             |                        |                 |       |                     |           |            |                          |                          |                       |                   |           |                   |                 |           |                   |
| MCF7        | <i>MYO9B</i>           | <i>FCHO1</i>    | Intra | GA II               | 8         | Y          | chr19:17047590-17185104  | chr19:17719526-17760377  | 13                    | -1.126            | 4         | -0.529            | Yes             |           |                   |
| MCF7        | <i>HSPE1</i>           | <i>PREI3</i>    | Intra | GA II               | 6         | Y          | chr2:198072965-198076432 | chr2:198089016-198125760 | 1                     | -0.361            | 4         | -0.361            | Yes             |           |                   |
| MCF7        | <i>PARD6G</i>          | <i>C18ORF1</i>  | Intra | GA II               | 6         | Y          | chr18:76016105-76106388  | chr18:13601664-13642753  | 10                    | -0.674            | 5         | -0.407            | Yes             |           |                   |
| MCF7        | <i>TRIM37</i>          | <i>TMEM49</i>   | Intra | GA II               | 6         | Y          | chr17:54414781-54539048  | chr17:55139644-55272734  | 14                    | 3.515             | 18        | 2.197             | Yes             |           |                   |
| MCF7        | <i>SMARCA4</i>         | <i>CARM1</i>    | Intra | GA II               | 5         | Y          | chr19:10955827-11033958  | chr19:10843252-10894448  | 8                     | 0.041             | 6         | 0.041             | Yes             |           |                   |
| MCF7        | <i>BCAS4</i>           | <i>ZMYND8</i>   | Intra | GA II               | 4         | Y          | chr20:48844873-48927121  | chr20:45271787-45418881  | 7                     | 2.107             | 15        | 3.860             | Yes             |           |                   |
| MCF7        | <i>PVT1 (BC041065)</i> | <i>MYC</i>      | Intra | GA II               | 4         | Y          | chr8:128875961-129182681 | chr8:128817496-128822862 | 27                    | 1.186             | 3         | 1.186             | Yes             |           |                   |
| MCF7        | <i>TRIM37</i>          | <i>RNFT1</i>    | Intra | GA II               | 3         | Y          | chr17:54414781-54539048  | chr17:55384504-55396899  | 14                    | 3.515             | 2         | 3.412             | Yes             |           |                   |
| MDA-MB-361  | <i>TMEM104</i>         | <i>CRKRS</i>    | Intra | GA II               | 18        | Y          | chr17:70284216-70347517  | chr17:34871265-34944326  | 9                     | 2.327             | 7         | 1.529             | Yes             |           |                   |
| MDA-MB-361  | <i>TANC1</i>           | <i>MTMR4</i>    | Intra | GA II               | 12        | Y          | chr2:159533391-159797416 | chr2:159533391-15950250  | 27                    | 0.000             | 6         | 1.658             | Yes             |           |                   |
| MDA-MB-361  | <i>TOX3</i>            | <i>GNAO1</i>    | Intra | GA II               | 7         | Y          | chr16:51029418-51139215  | chr16:54782751-54939612  | 10                    | -0.157            | 19        | 0.281             | Yes             |           |                   |
| MDA-MB-453  | <i>MECP2</i>           | <i>TMLHE</i>    | Intra | GA II               | 8         | Y          | chrX:152948879-153016382 | chrX:154375389-154495816 | 8                     | 1.611             | 11        | 1.602             | Yes             |           |                   |
| MDA-MB-453  | <i>MYO15B</i>          | <i>MAP3K3</i>   | Intra | GA II               | 4         | Y          | chr17:71095733-71134522  | chr17:59053532-59127402  | 3                     | 0.543             | 10        | 0.494             | Yes             |           |                   |
| MDA-MB-468  | <i>UBR5</i>            | <i>SLC25A32</i> | Intra | GA II               | 8         | Y          | chr8:103334744-103493671 | chr8:104480041-104496644 | 18                    | 0.070             | 4         | 0.927             | Yes             |           |                   |
| MDA-MB-468  | <i>ARD1A</i>           | <i>MAST2</i>    | Intra | GA II               | 5         | Y          | chr1:26895108-26981188   | chr1:46041871-46274383   | 10                    | 0.266             | 23        | 0.818             | Yes             |           |                   |
| MDA-MB-468  | <i>EGFR</i>            | <i>POLD1</i>    | Intra | GA II               | 5         | Y          | chr7:55054218-55203822   | chr19:55579404-55613083  | 17                    | 4.944             | 4         | 0.732             | Yes             |           |                   |
| MDA-MB-468  | <i>RDH13</i>           | <i>FBXO3</i>    | Intra | GA II               | 3         | Y          | chr19:60247503-60266397  | chr11:33724866-33752647  | 2                     | 0.853             | 3         | 1.507             | Yes             |           |                   |
| UACC-893    | <i>FBXL20</i>          | <i>CRKRS</i>    | Intra | GA II               | 31        | Y          | chr17:34662422-34811435  | chr17:34871265-34944326  | 17                    | 2.069             | 7         | 4.175             | Yes             |           |                   |
| UACC-893    | <i>CCDC6</i>           | <i>ANK3</i>     | Intra | GA II               | 27        | Y          | chr10:61218511-61336420  | chr10:61458164-61570752  | 17                    | 0.890             | 13        | 0.890             | Yes             |           |                   |
| UACC-893    | <i>g67V</i>            | <i>PPPIR1B</i>  | Intra | GA II               | 23        | Y          | chr17:35152031-35157064  | chr17:35038278-35046404  | 1                     | 4.843             | 2         | 4.843             | Yes             |           |                   |
| UACC-893    | <i>MEDI</i>            | <i>IKZF3</i>    | Intra | GA II               | 9         | Y          | chr17:34814063-34861053  | chr17:35174724-35273967  | 4                     | 3.908             | 10        | 4.843             | Yes             |           |                   |
| UACC-893    | <i>EIF2AK3</i>         | <i>PRKD3</i>    | Intra | GA II               | 5         | Y          | chr2:88637373-88708209   | chr2:37331149-37397726   | 8                     | 1.213             | 8         | 1.278             | Yes             |           |                   |
| ZR-75-1     | <i>FOXJ3</i>           | <i>CAMTA1</i>   | Intra | GA II               | 10        | Y          | chr1:42414796-42573490   | chr1:6767970-6854694     | 17                    | -0.380            | 10        | -0.089            | Yes             |           |                   |
| ZR-75-1     | <i>GPATCH3</i>         | <i>CAMTA1</i>   | Intra | GA II               | 10        | Y          | chr1:27089565-27099549   | chr1:6767970-6854694     | 3                     | -0.225            | 10        | -0.089            | Yes             |           |                   |
| ZR-75-1     | <i>C10RF151</i>        | <i>RCC2</i>     | Intra | GA II               | 9         | Y          | chr1:19796057-19828901   | chr1:17605837-17637644   | 4                     | -0.013            | 4         | -0.225            | Yes             |           |                   |

Fusions with a recurrent partner are highlighted in yellow.

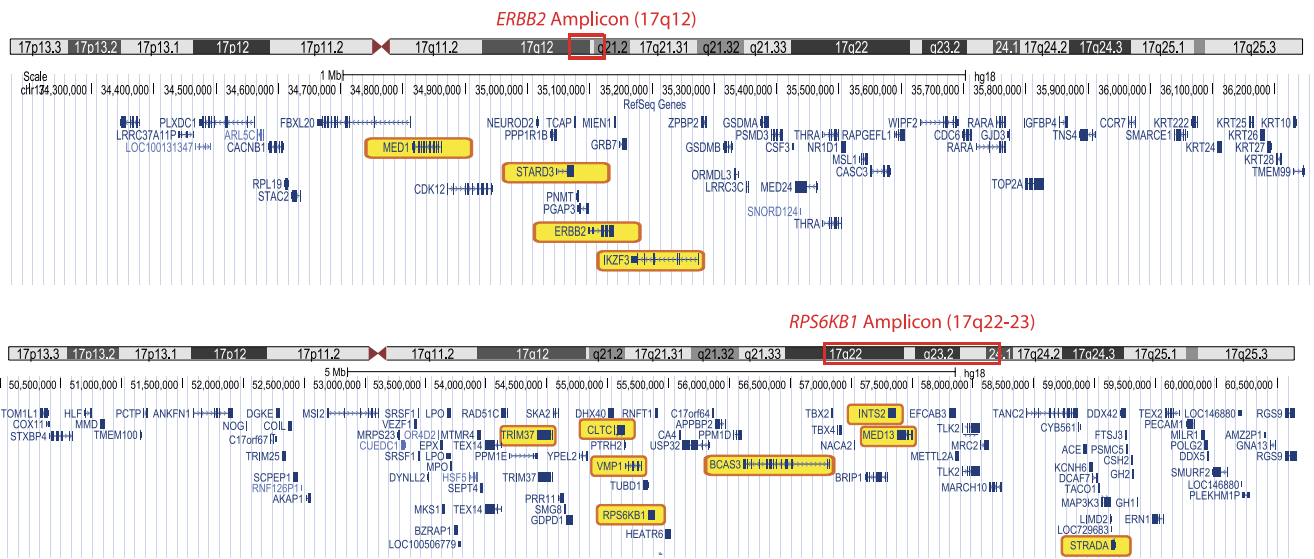

**Figure W1.** UCSC tracks displaying the *ERBB2* and *RPS6KB1* amplicons, with fusion genes highlighted in yellow.

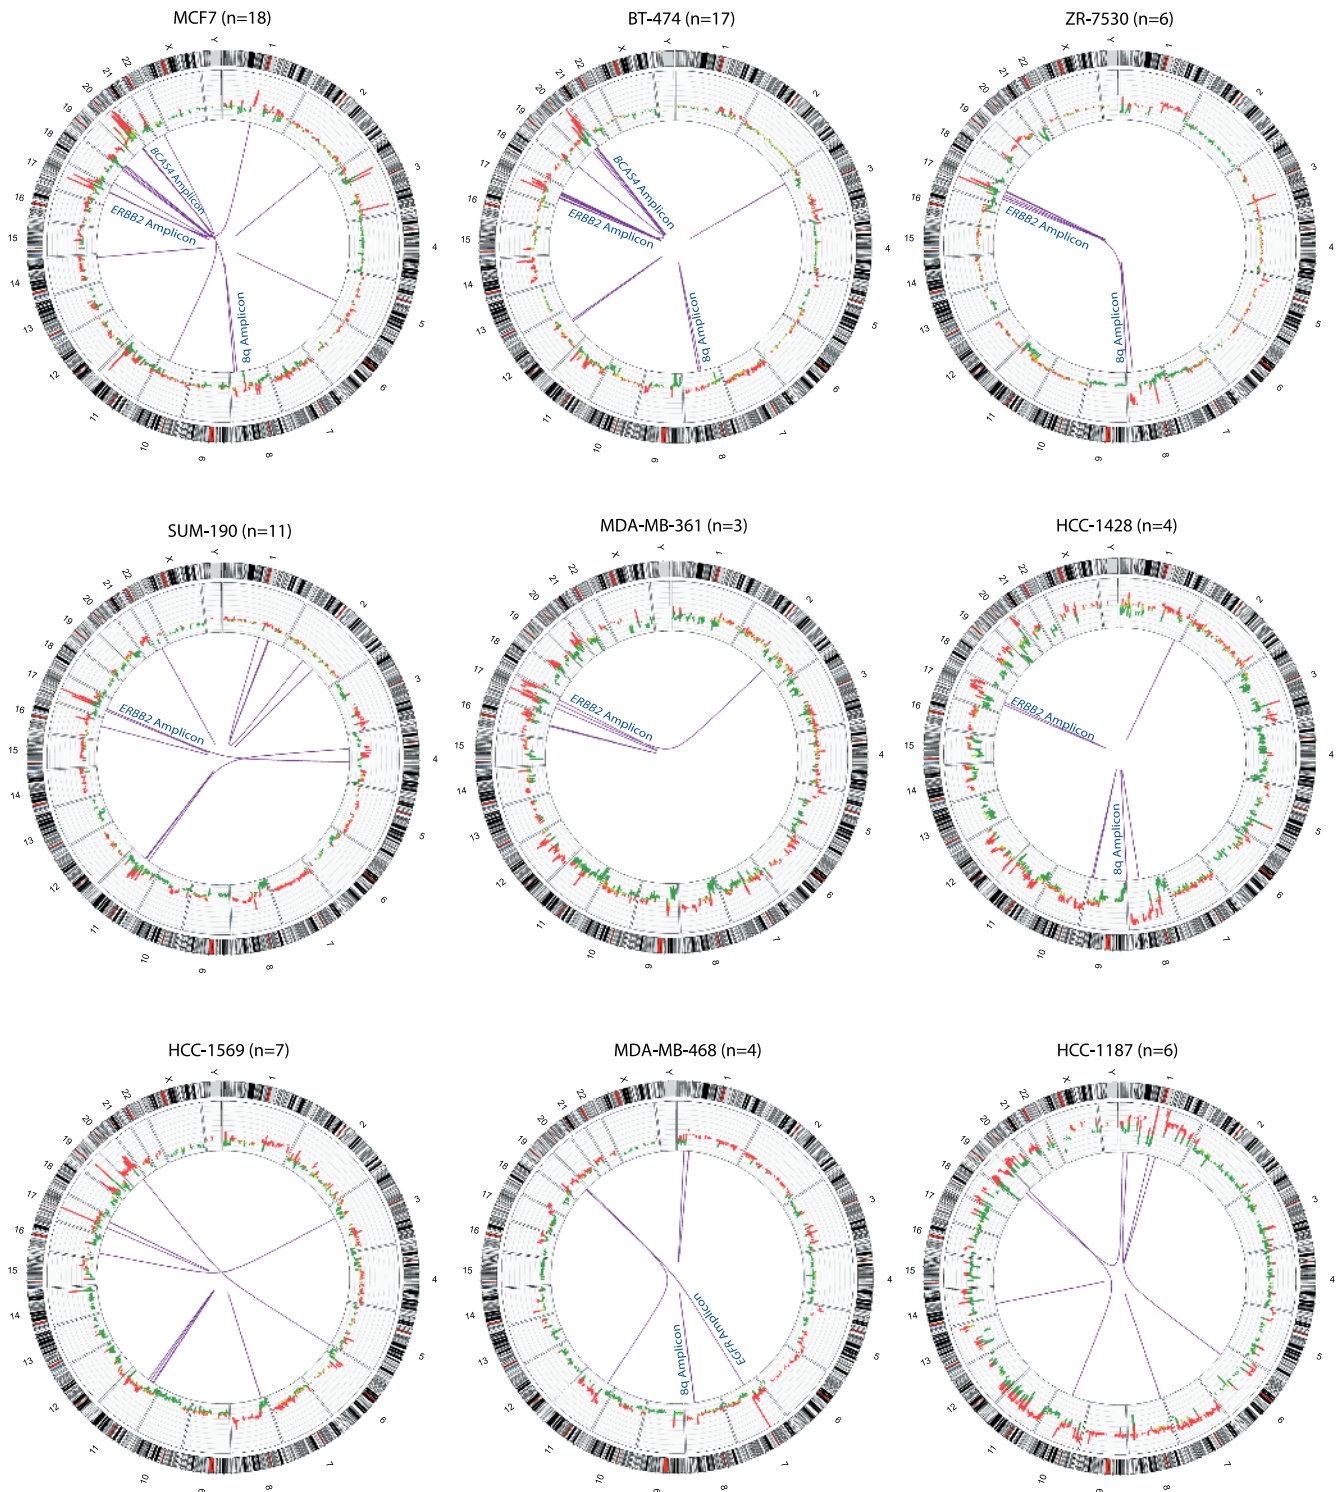

**Figure W2.** Graphical representation of integrative analysis of gene fusions with copy number analysis. Circos plots of the genome-wide distribution of gene fusions along with status of copy number alterations. Red and green peaks represent amplifications and deletions; purple line represents the fusions associated with amplicons and nonamplicons, respectively. “*n*” refers to the total number of fusions identified.

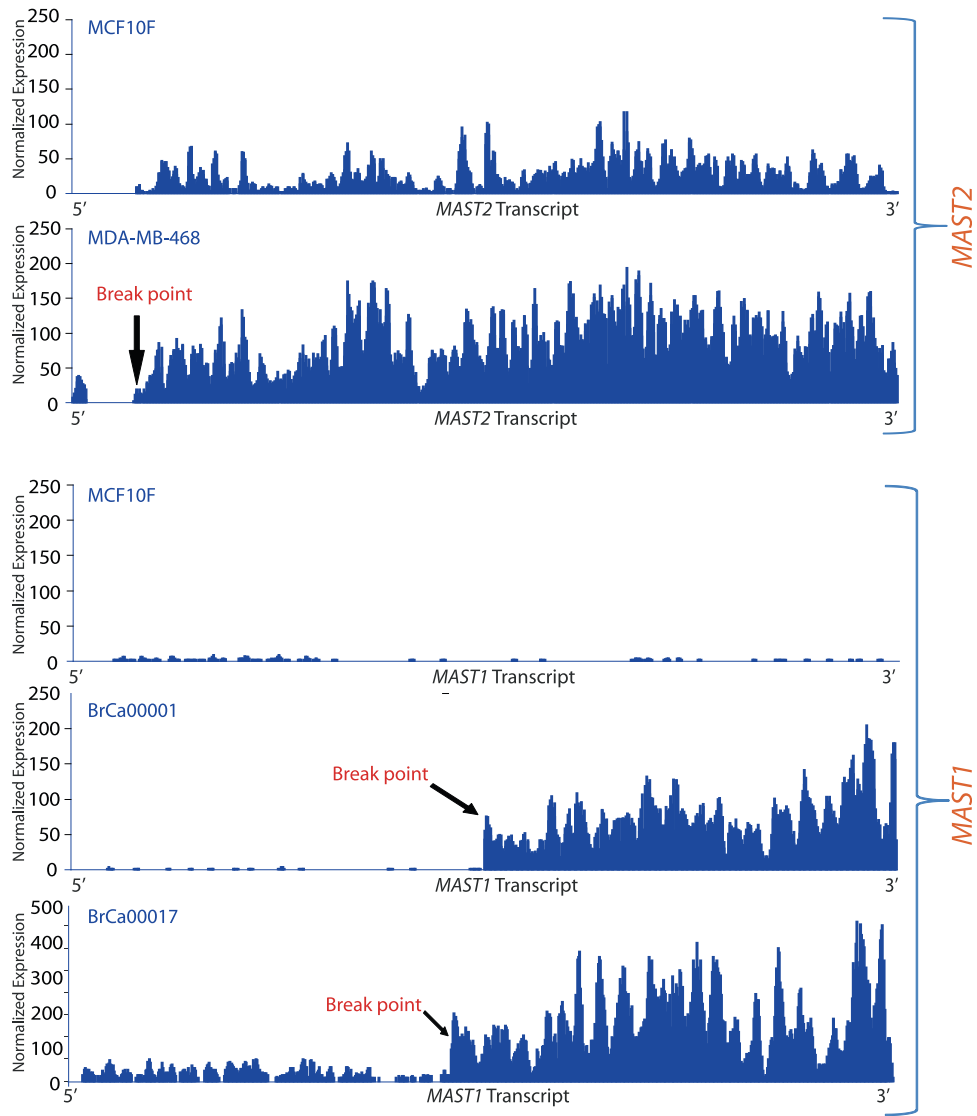

**Figure W3.** Plot of normalized coverage of *MAST1* and *MAST2* transcripts in *MAST* fusion-positive samples (breakpoint indicated by arrow).

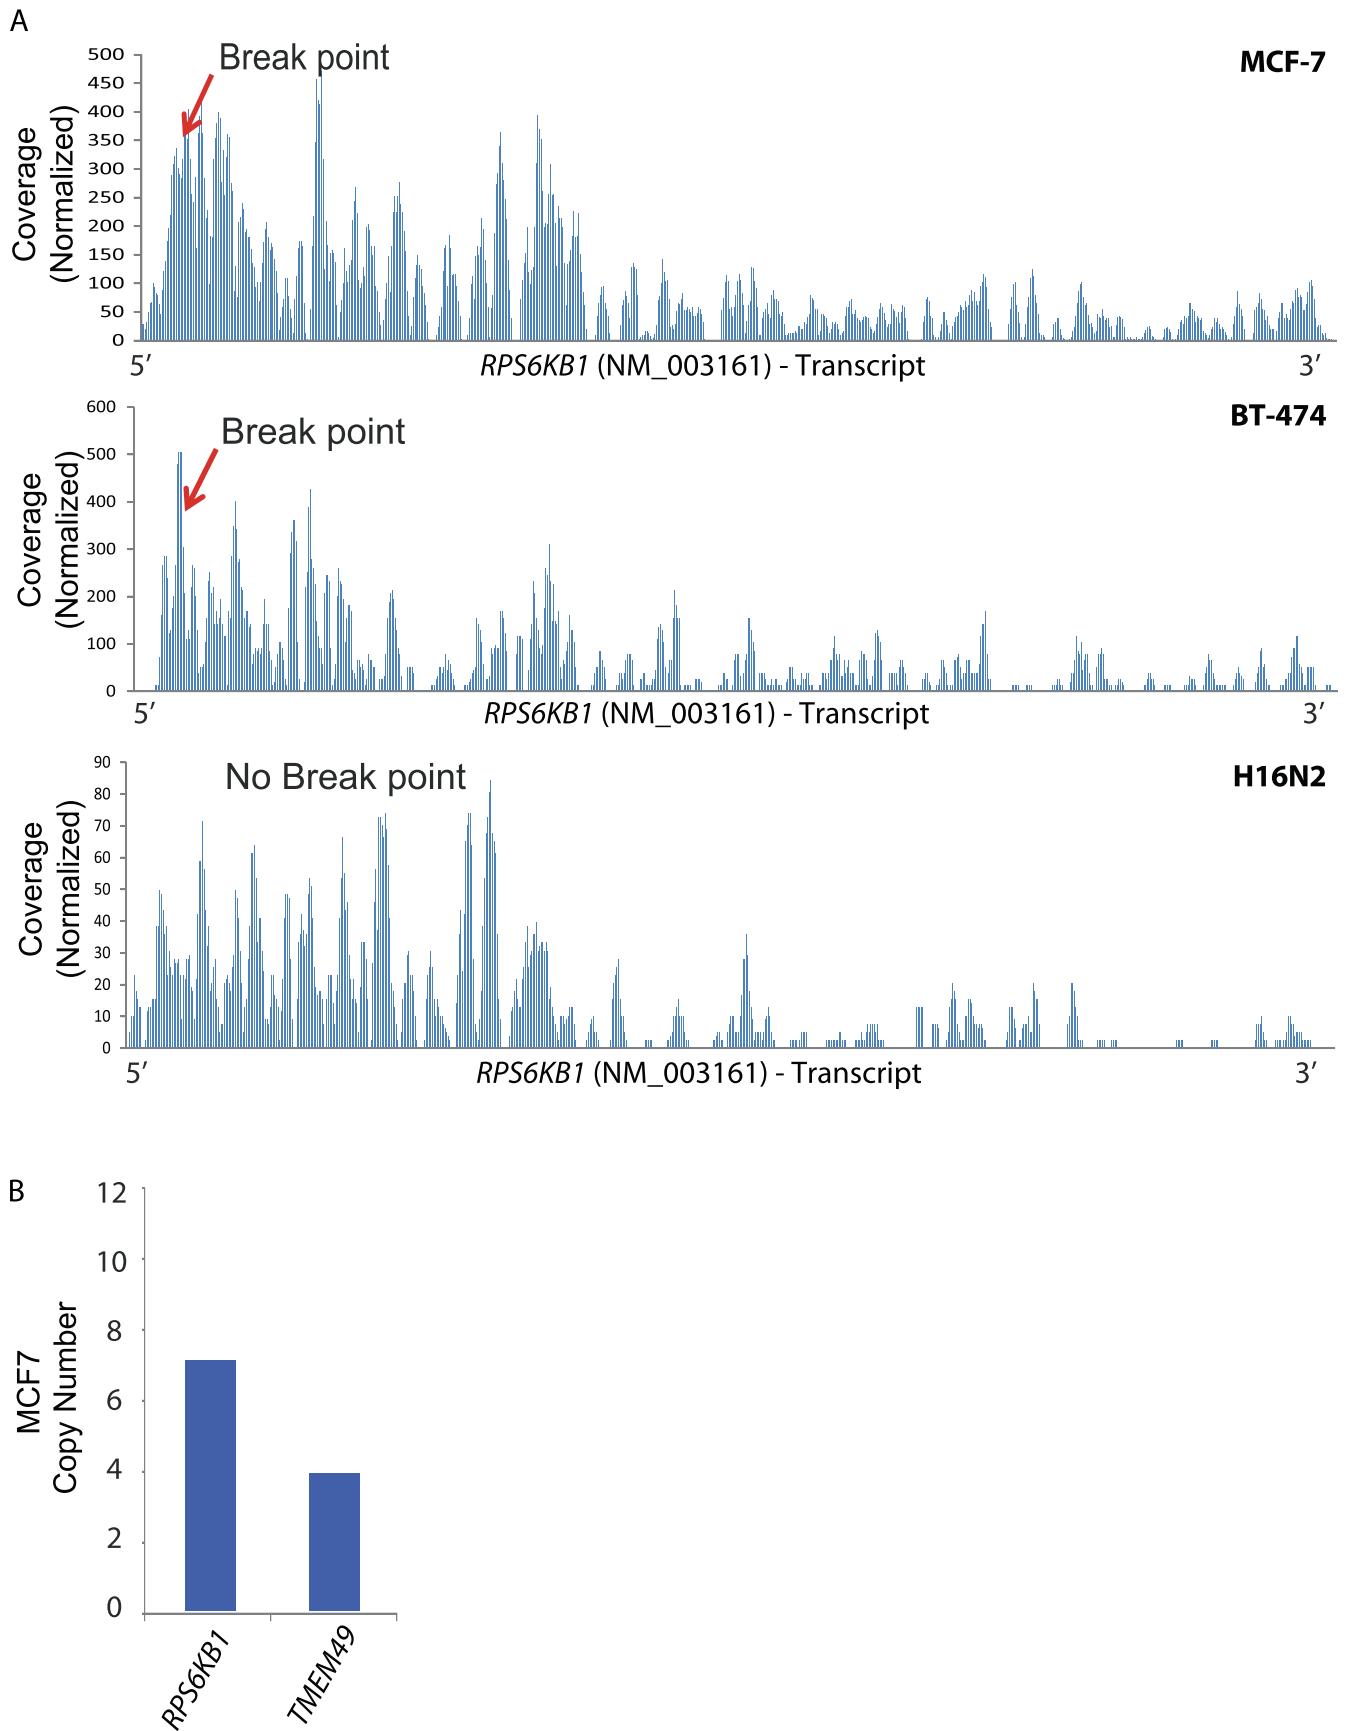

**Figure W4.** (A) Plot of normalized coverage of *RPS6KB1* transcript in BT-474, MCF7, and H16N2 cell lines. (B) Bar graph representing the copy number of *RPS6KB1* and *TMEM49* in MCF7.
